# Supplementary material for: Looking beyond kinematics: 3D thermo-mechanical modelling reveals the dynamics of transform margins
Source: Copernicus journal article supplement (doi:10.5194/se-12-1211-2021), 2021-05-31

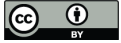

*Supplement of*

## **Looking beyond kinematics: 3D thermo-mechanical modelling reveals the dynamics of transform margins**

**Anthony Jourdon et al.**

*Correspondence to:* Anthony Jourdon ([jourdon\\_anthony@hotmail.fr](mailto:jourdon_anthony@hotmail.fr)) and Guillaume Duclaux ([guillaume.duclaux@unice.fr](mailto:guillaume.duclaux@unice.fr))

The copyright of individual parts of the supplement might differ from the article licence.

Figure S1

## Weak Lower Crust

$\alpha = 15^\circ$

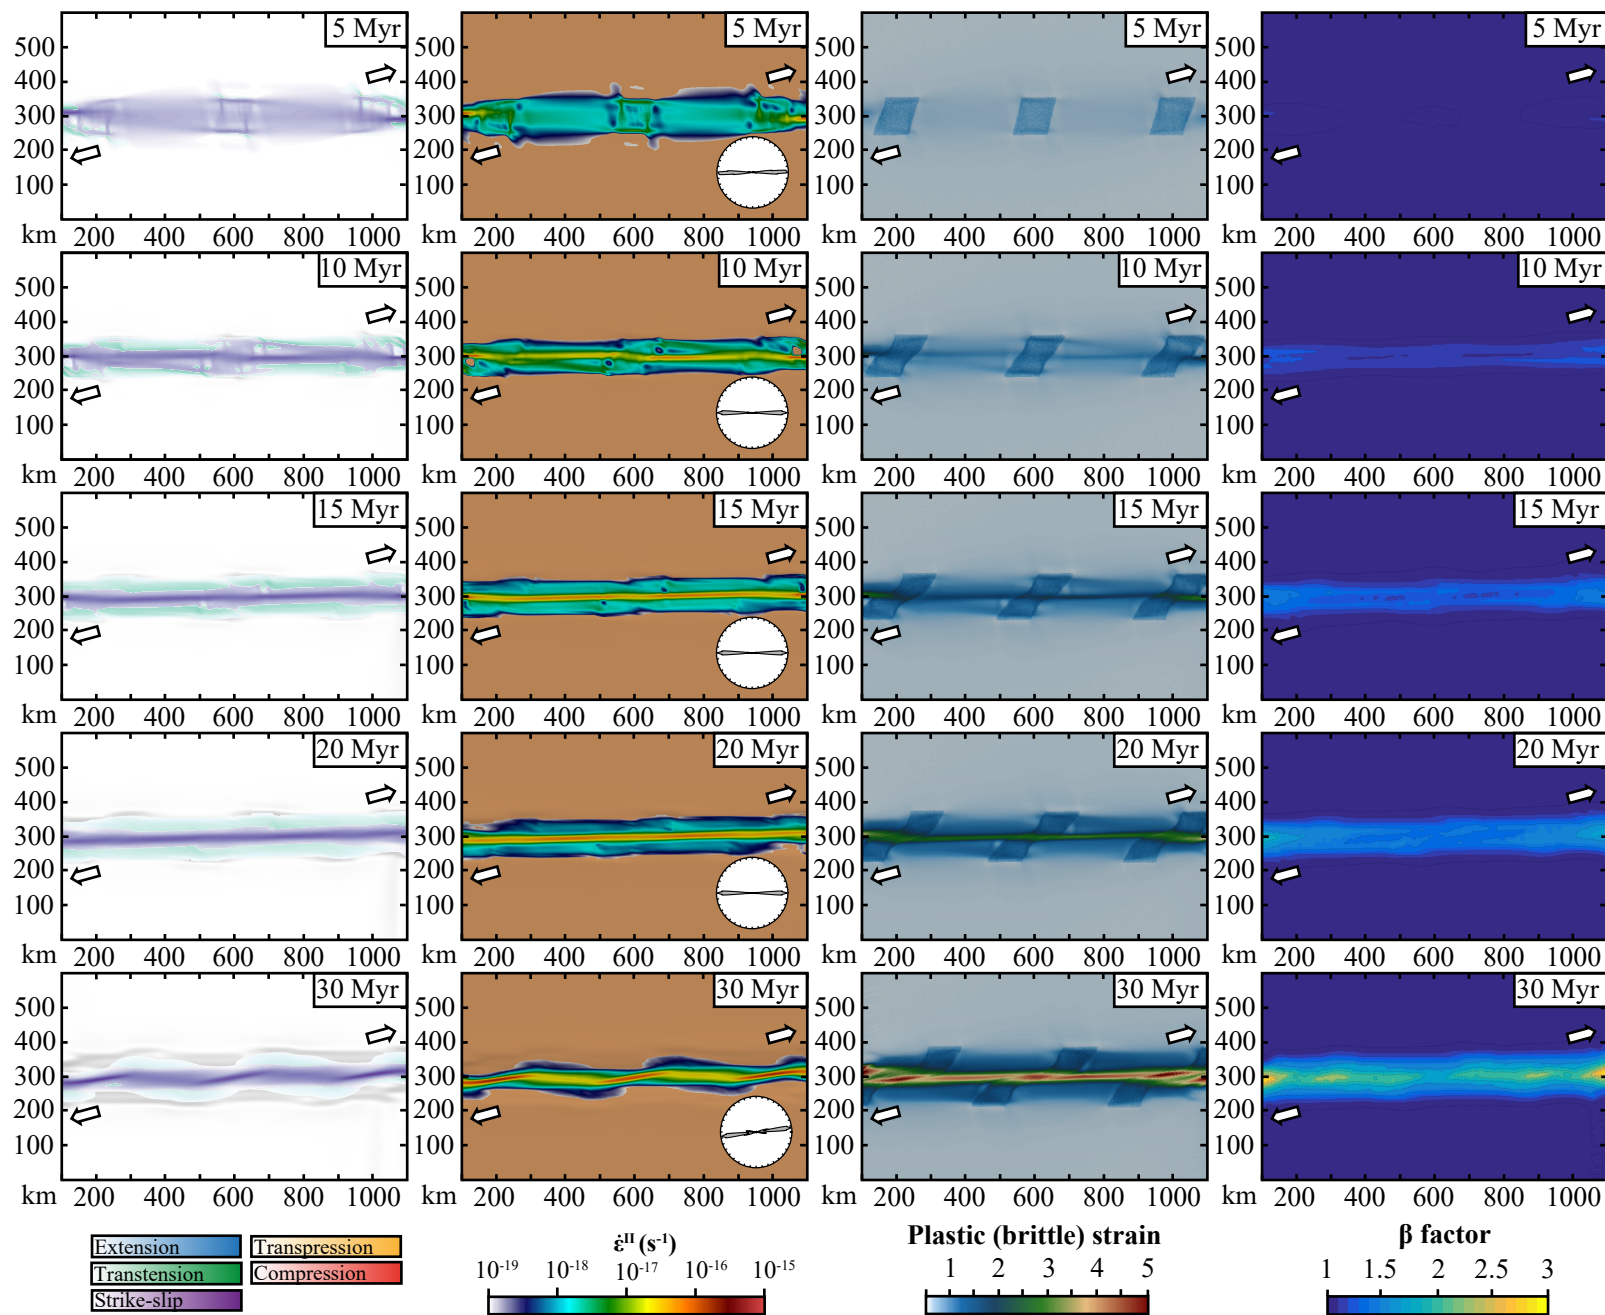

Figure S2

## Weak Lower Crust

 $\alpha = 30^\circ$ 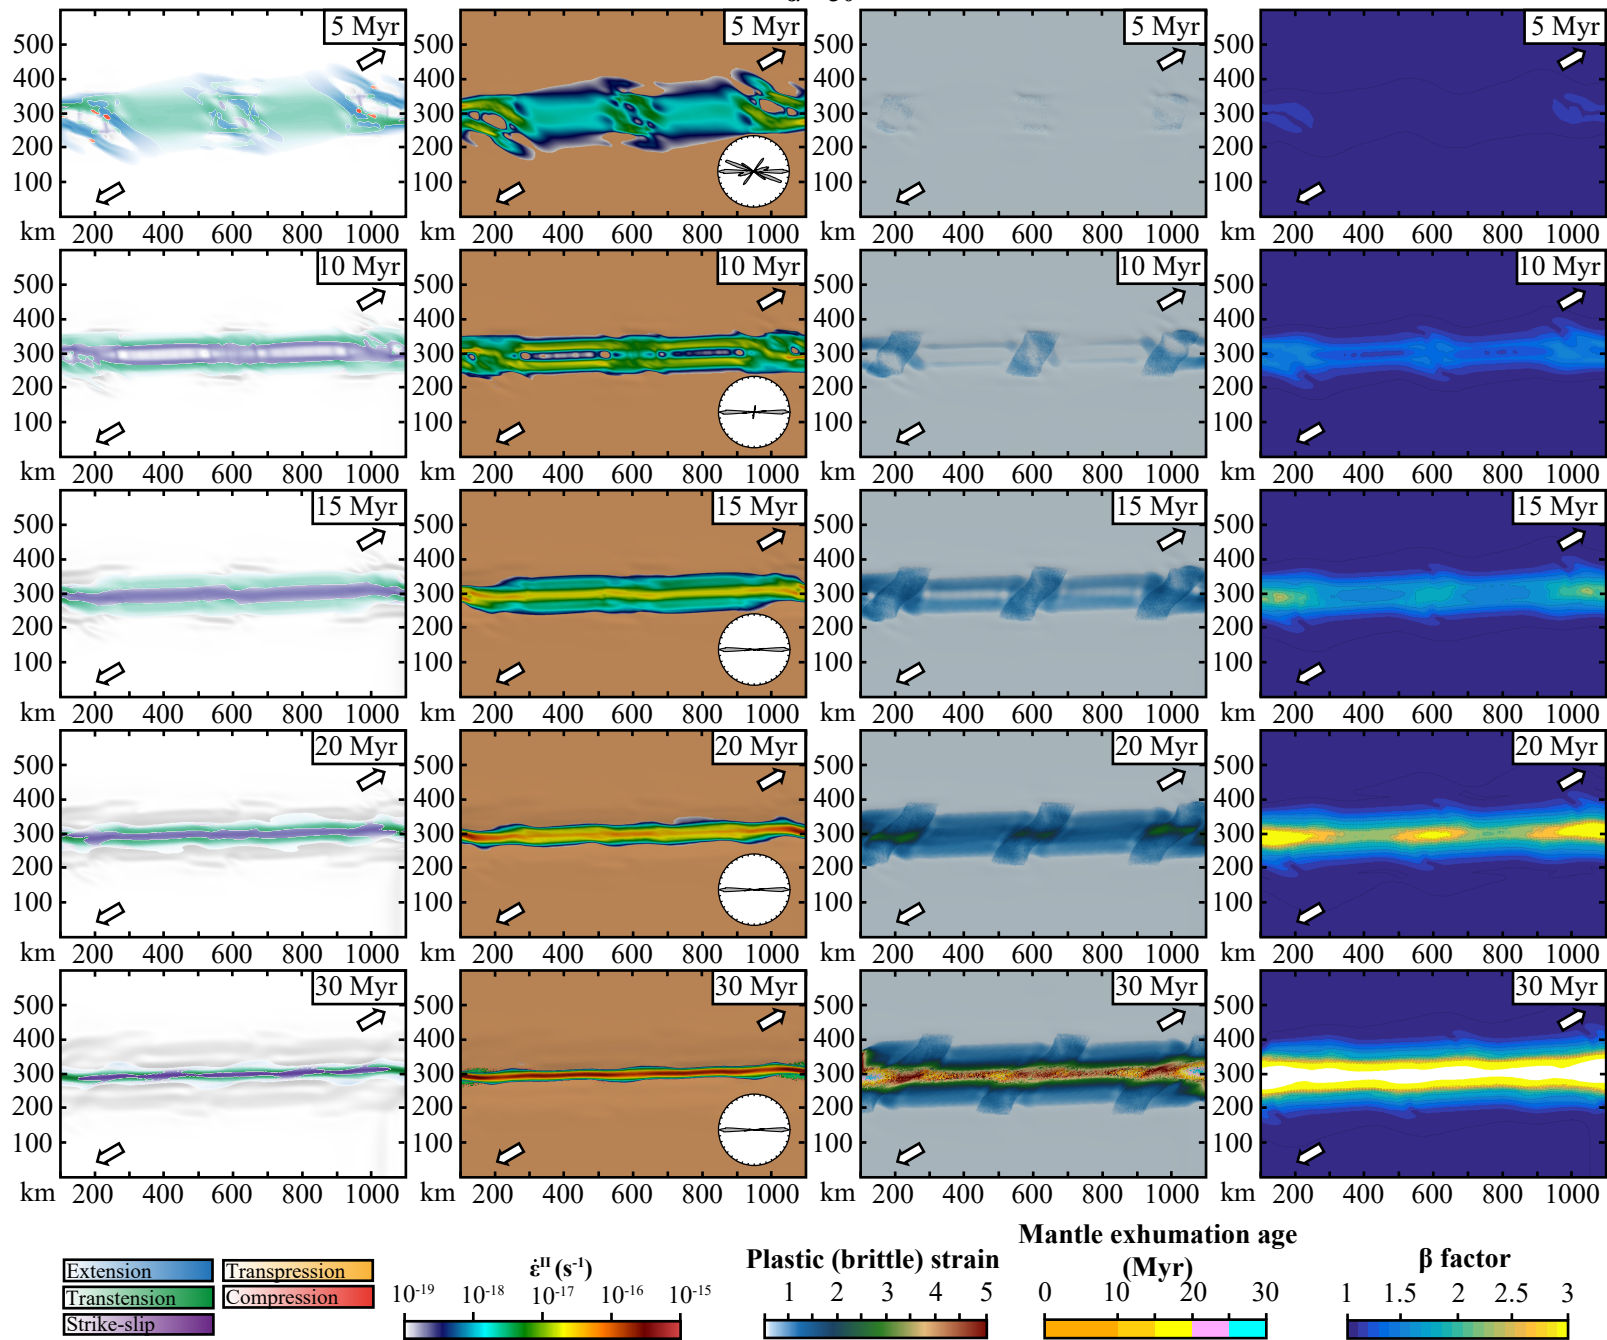

Figure S3

## Strong Lower Crust

$\alpha = 30^\circ$

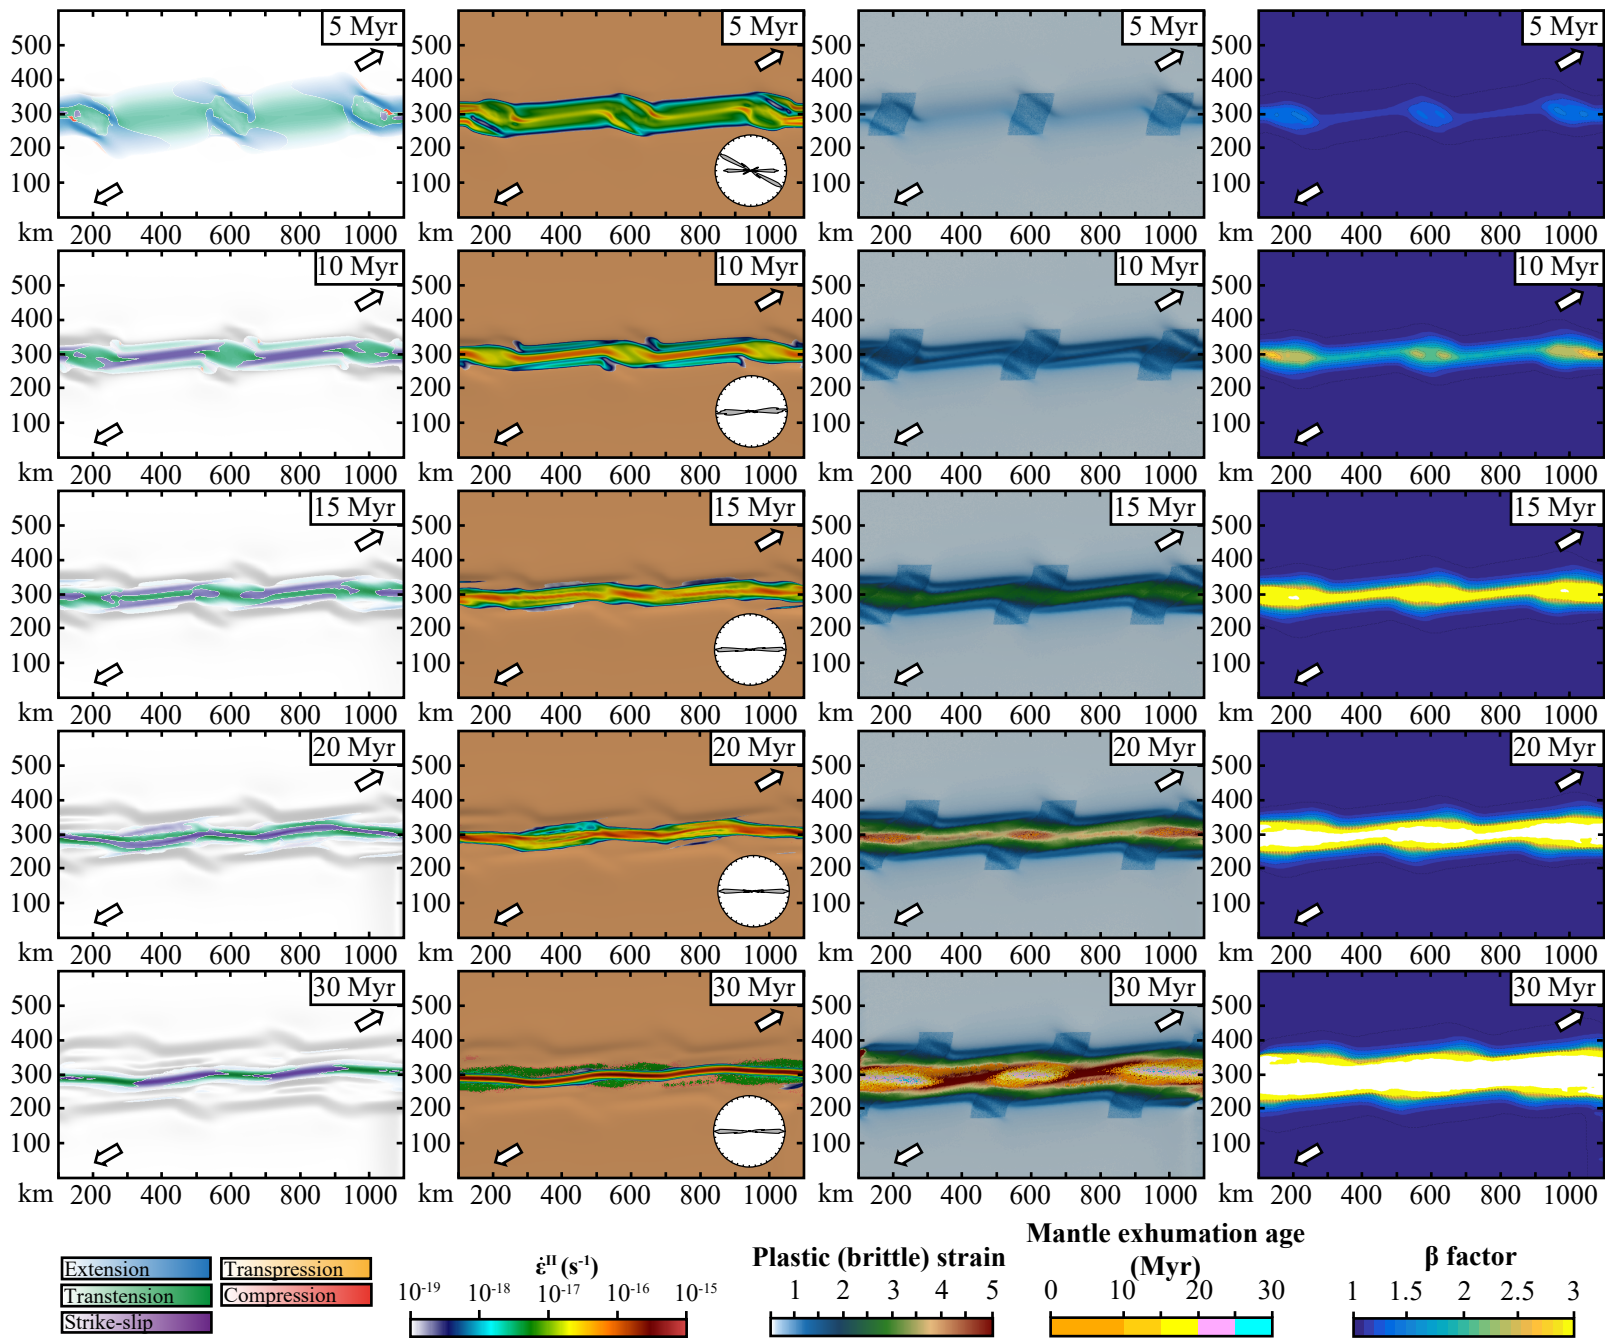

Figure S4

## Weak Lower Crust

 $\alpha = 45^\circ$ 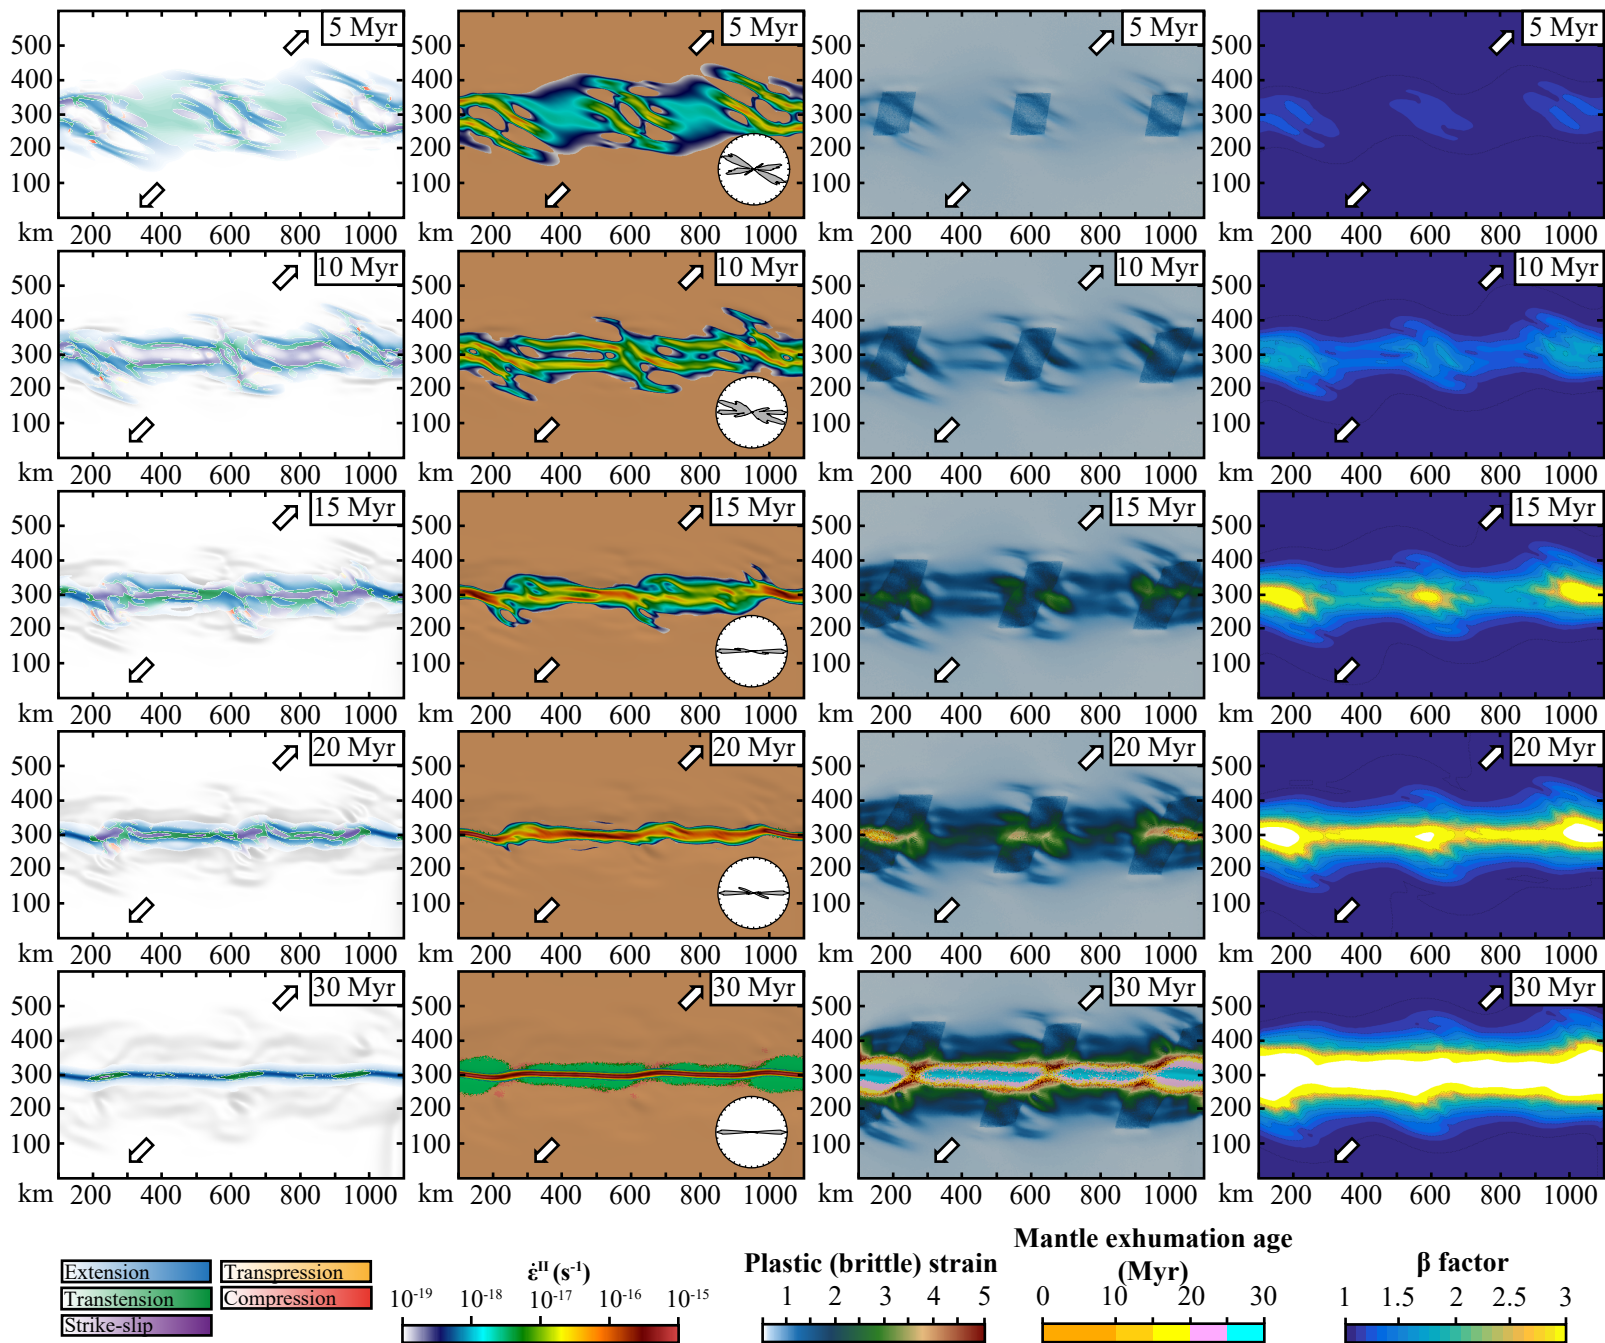

Figure S5

## Strong Lower Crust

$\alpha = 60^\circ$

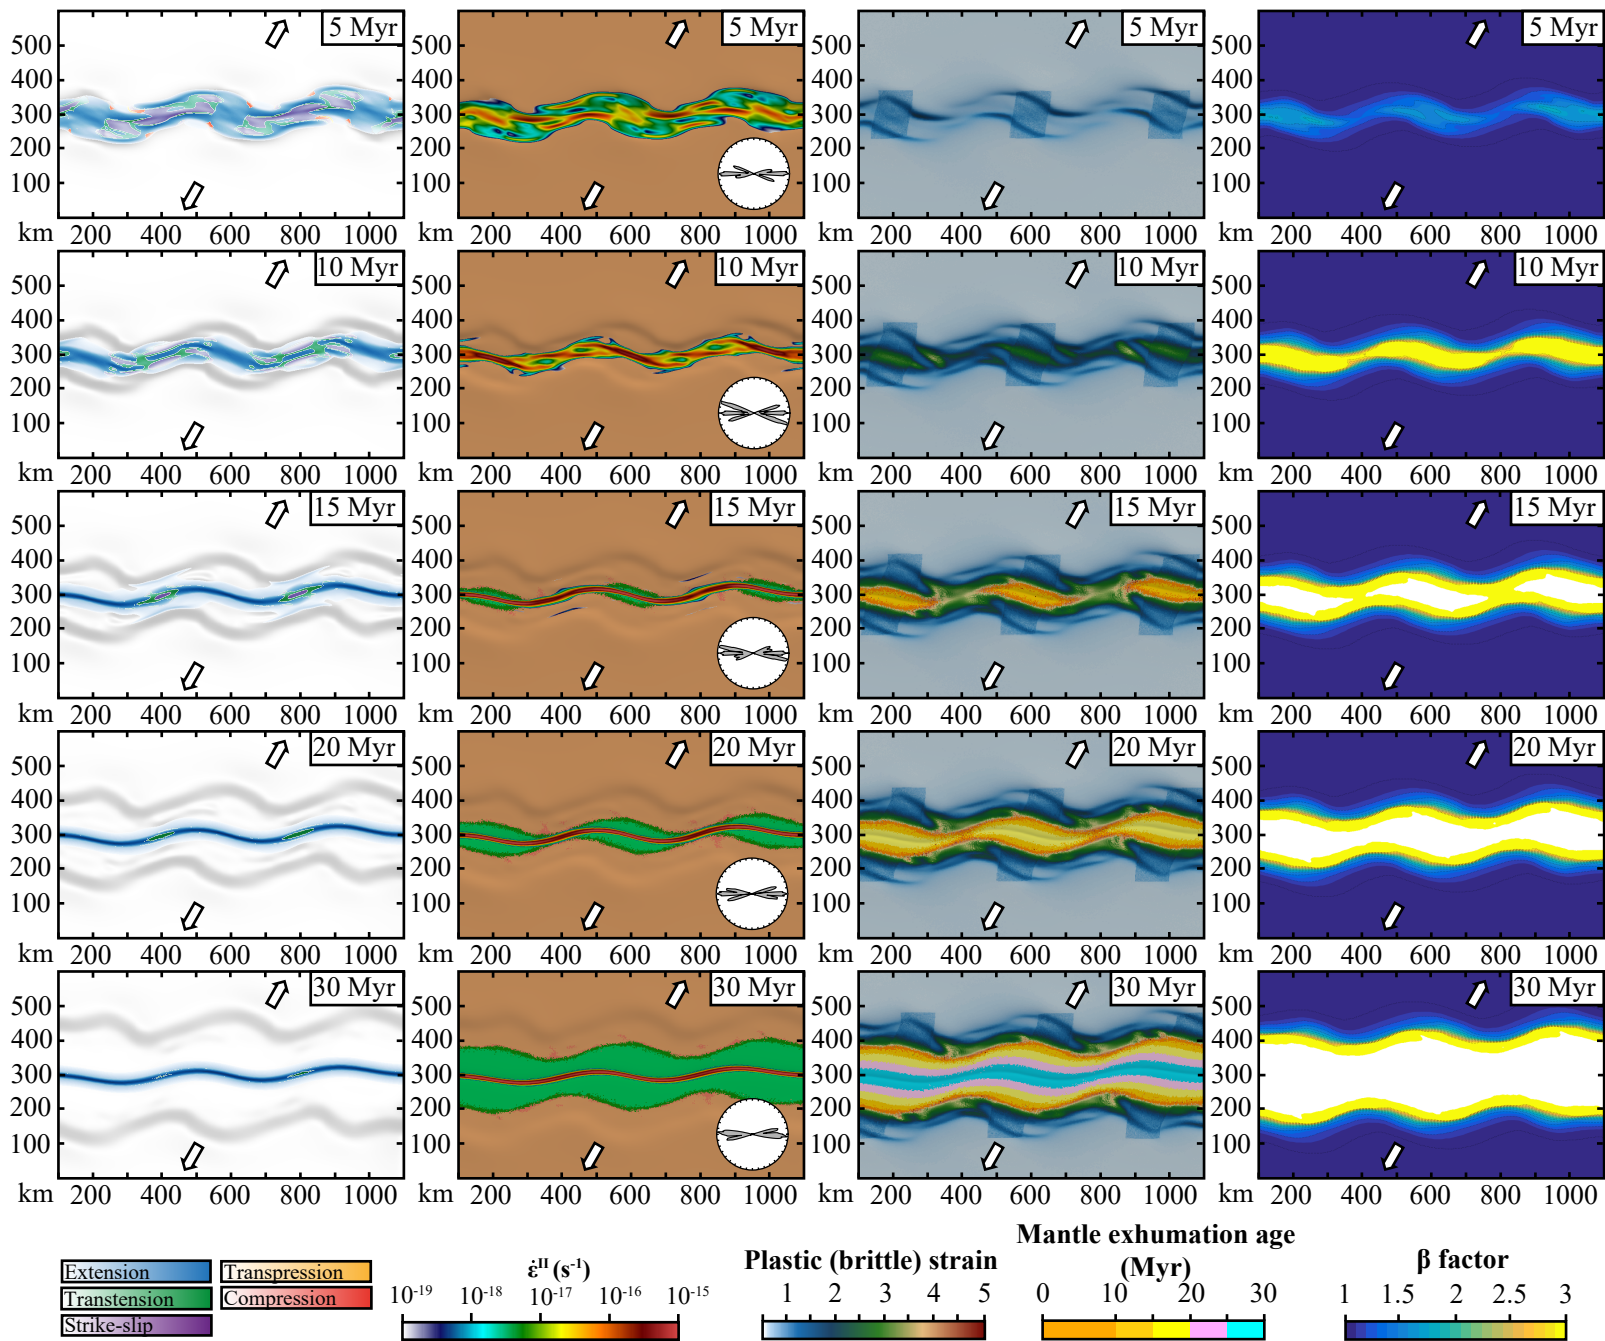

Figure S6

## Weak Lower Crust

 $\alpha = 75^\circ$ 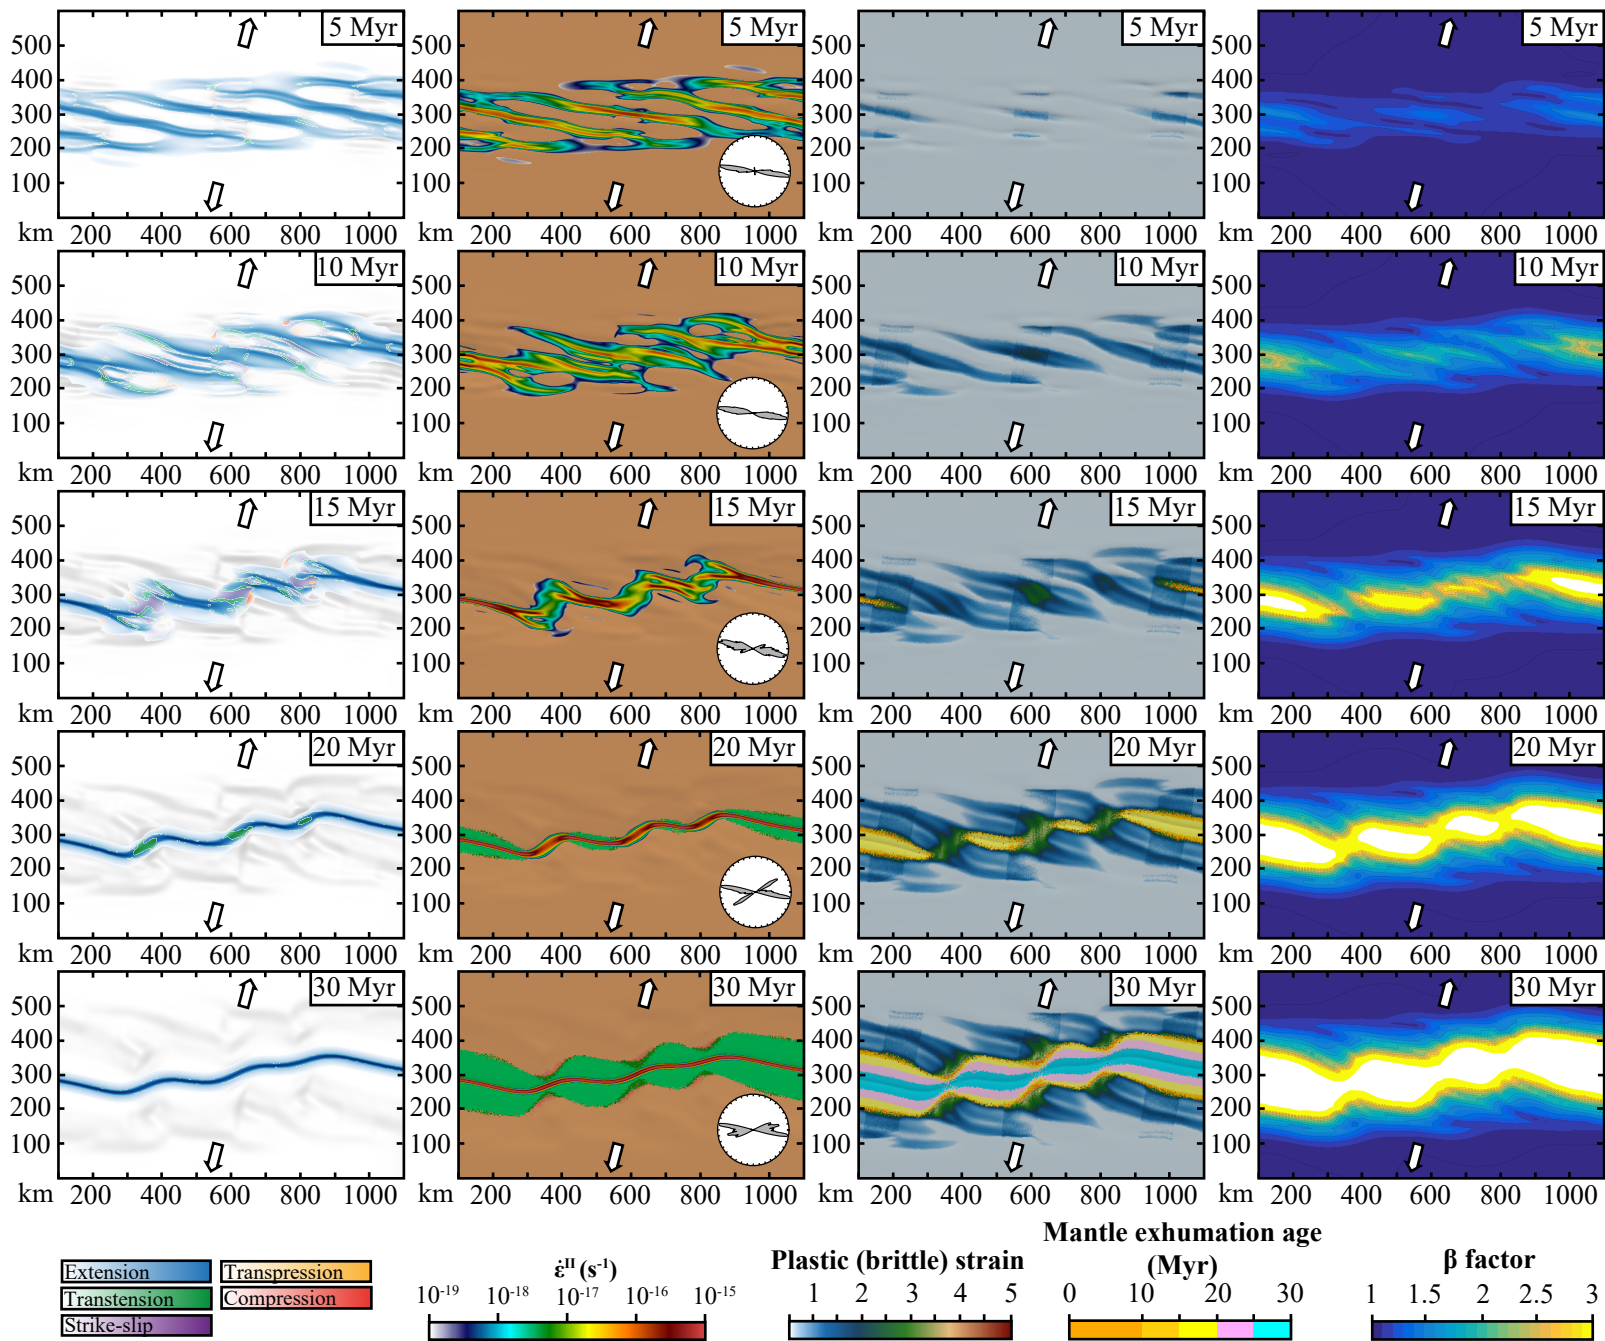

Figure S7

## Strong Lower Crust

 $\alpha = 75^\circ$ 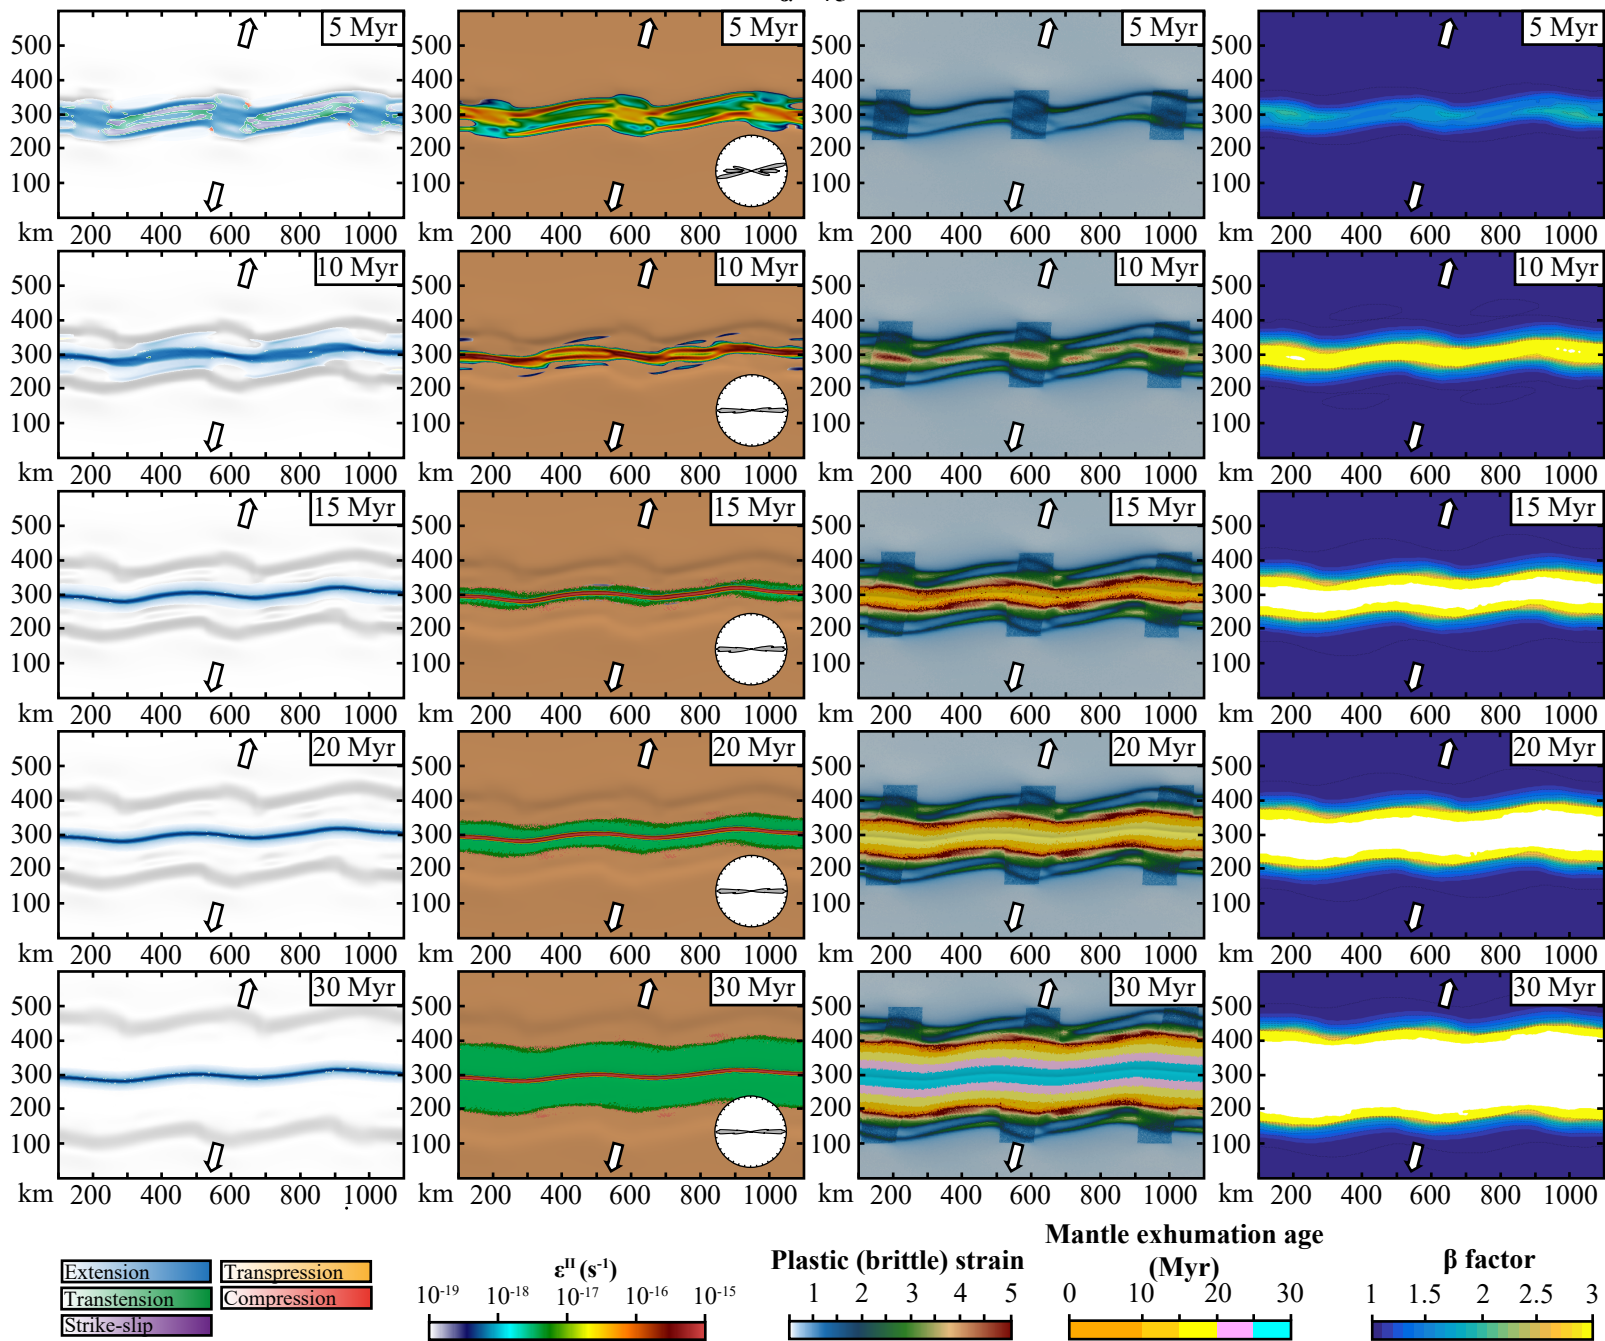

Supplement: Supplementary file 1 [file se-12-1211-2021-supplement.pdf]
